# Supplementary material
Source: Springer Nature journal article supplement (https://www.um.edu.mt/library/oar/bitstream/123456789/145515/3/12912_2026_4565_MOESM2_ESM.pdf)
Supplement: MOESM2 [file 12912_2026_4565_MOESM2_ESM.pdf]

**INTERVIEWER SUMMARY DATA TABLE**

**Date:** \_\_/\_\_/\_\_\_\_

**Participant ID:** \_\_\_\_\_

**Country:** \_\_\_\_\_

**Reviewed by:** \_\_\_\_\_

**Completed by:** \_\_\_\_\_

**Age:** \_\_\_\_ **Gender:** \_\_\_\_ **Title:**  RN  Nurse Manager  Senior Nurse  Other \_\_\_\_

**Education:**  BsN  MSc  PhD  Other \_\_\_\_

**Position:**  Tactical  Strategical  Political  Committee/Boards/Leadership **Role:**  Chief Nurse Officer  Professor/Researcher  Other  
\_\_\_\_\_

**Years at current position:** \_\_\_\_\_

**Years in a leading position:** \_\_\_\_\_

**Other relevant information:** \_\_\_\_\_

|                           |                                                                                                                                                                                                                                                                                                   |                                                                                              |
|---------------------------|---------------------------------------------------------------------------------------------------------------------------------------------------------------------------------------------------------------------------------------------------------------------------------------------------|----------------------------------------------------------------------------------------------|
| <b>1. Role definition</b> | <p><b>1-</b> Describe in brief your role in your institution during the COVID-19 pandemic</p> <p><u>Probe:</u> Give a short description of your general activities</p>                                                                                                                            | <p><b>Quotes:</b></p>                                                                        |
|                           | <p><b>2-</b> Were you actively involved in political/strategical/ tactical/committees decision-making even before the COVID-19 pandemic? (Use the right word according to the informant)</p> <p><u>Probe:</u> Give a brief summary of your involvement in decision making before the pandemic</p> | <p><input type="checkbox"/> Yes</p> <p><input type="checkbox"/> No</p> <p><b>Quotes:</b></p> |
|                           | <p><b>3-</b> List the 3 most frequent tasks related to decision- making that you performed during the COVID-19 pandemic.</p> <p><u>Probe:</u> How frequently do you perform these tasks and for how long?</p>                                                                                     | <p>1. _____</p> <p>2. _____</p> <p>3. _____</p> <p><b>Quotes:</b></p>                        |

|                                        |                                                                                                                                                                                                                                                                |                                                                                                            |
|----------------------------------------|----------------------------------------------------------------------------------------------------------------------------------------------------------------------------------------------------------------------------------------------------------------|------------------------------------------------------------------------------------------------------------|
|                                        | <p><b>5-</b> List 3 trigger factors that made you clear you had to make decisions during the COVID-19 pandemic</p>                                                                                                                                             | <p>1.</p> <p>2.</p> <p>3.</p> <p><b>Notes:</b></p>                                                         |
|                                        | <p><b>6-</b> Were you aware of the consequences of the decisions you made during the COVID – 19 pandemic?</p> <p>Probe: Do you feel able to project in the future the consequences of your decisions?</p>                                                      | <p><input type="checkbox"/> <b>Yes</b></p> <p><input type="checkbox"/> <b>No</b></p> <p><b>Quotes:</b></p> |
| <p><b>2. Situational awareness</b></p> | <p><b>4-</b> Were you able to get a general understanding of the impact that the COVID-19 pandemic would have play out from the beginning?</p> <p><u>Probe:</u> Did you perceive the workplace issues related to the COVID-19 pandemic from the beginning?</p> | <p><input type="checkbox"/> Yes</p> <p><input type="checkbox"/> No</p> <p><b>Quotes:</b></p>               |

|                           |                                                                                                                                                                                                                  |                                                                                              |
|---------------------------|------------------------------------------------------------------------------------------------------------------------------------------------------------------------------------------------------------------|----------------------------------------------------------------------------------------------|
|                           | <p><b>5-</b> List 3 trigger factors that made you clear you had to make decisions during the COVID-19 pandemic</p>                                                                                               | <p>1. _____</p> <p>2. _____</p> <p>3. _____</p> <p><b>Notes:</b></p>                         |
|                           | <p><b>6-</b> Were you aware of the consequences of the decisions you made during the COVID – 19 pandemic?</p> <p><u>Probe:</u> Do you feel able to project in the future the consequences of your decisions?</p> | <p><input type="checkbox"/> Yes</p> <p><input type="checkbox"/> No</p> <p><b>Quotes:</b></p> |
| <p><b>3. Decision</b></p> | <p><b>7-</b> List up to 3 most relevant decisions you had to make during the COVID-19 pandemic.</p>                                                                                                              | <p>1. _____</p> <p>2. _____</p> <p>3. _____</p> <p><b>Notes:</b></p>                         |

**8-** For each of these 3 decisions, how would you describe them:

**Decision 1.** (*read list above*):

- Was it an independent decision?
- Was a decision shared with a group?

Probe: Was it based on your personal judgement?

Why did you decide by yourself? If shared with a group, was it a unanimous decision?

Could you define this decision as:

- A creative solution (i.e., completely new, taken based on an intuition or other)
- A ready-made decision that has been modified/adapted
- An imposed decision

Probe: In what way (how) was it a new/ready-made decision? If it was an

**Quotes:**

|  |                                                                                                                                                                                                                                                                                                                                                                                                                                                                                                                                                                                                                                        |                       |
|--|----------------------------------------------------------------------------------------------------------------------------------------------------------------------------------------------------------------------------------------------------------------------------------------------------------------------------------------------------------------------------------------------------------------------------------------------------------------------------------------------------------------------------------------------------------------------------------------------------------------------------------------|-----------------------|
|  | <p>imposed decision, who or what imposed that decision?</p>                                                                                                                                                                                                                                                                                                                                                                                                                                                                                                                                                                            |                       |
|  | <p><b>Decision 2. (read list above):</b></p> <ul style="list-style-type: none"><li><input type="checkbox"/> Was it an independent decision?</li><li><input type="checkbox"/> Was a decision shared with a group?</li></ul> <p><u>Probe:</u> Was it based on your personal judgement?</p> <p>Why did you decide by yourself? If shared with a group, was it a unanimous decision?</p> <p>Could you define this decision as:</p> <ul style="list-style-type: none"><li><input type="checkbox"/> A creative solution (i.e., completely new, taken based on an intuition or other)</li><li><input type="checkbox"/> A ready-made</li></ul> | <p><b>Quotes:</b></p> |

|  |                                                                                                                                                                                                                                                                                                                                                                                                                                                                                                                                                                                                                                                                                     |                       |
|--|-------------------------------------------------------------------------------------------------------------------------------------------------------------------------------------------------------------------------------------------------------------------------------------------------------------------------------------------------------------------------------------------------------------------------------------------------------------------------------------------------------------------------------------------------------------------------------------------------------------------------------------------------------------------------------------|-----------------------|
|  | <p>decision that has<br/>been<br/>modified/adapted</p> <ul style="list-style-type: none"><li><input type="checkbox"/> An imposed decision</li></ul> <p>Probe: In what way (how) was it a new/ready-made decision? If it was an imposed decision, who or what imposed that decision?</p> <p><b>Decision 3.</b> (<i>read list above</i>):</p> <ul style="list-style-type: none"><li><input type="checkbox"/> Was it an independent decision?</li><li><input type="checkbox"/> Was a decision shared with a group?</li></ul> <p><u>Probe</u>: Was it based on your personal judgement?</p> <p>Why did you decide by yourself? If shared with a group, was it a unanimous decision?</p> | <p><b>Quotes:</b></p> |
|--|-------------------------------------------------------------------------------------------------------------------------------------------------------------------------------------------------------------------------------------------------------------------------------------------------------------------------------------------------------------------------------------------------------------------------------------------------------------------------------------------------------------------------------------------------------------------------------------------------------------------------------------------------------------------------------------|-----------------------|

|  |                                                                                                                                                                                                                                                                                                                                                                                                                                                                                           |                                                                                                                                        |
|--|-------------------------------------------------------------------------------------------------------------------------------------------------------------------------------------------------------------------------------------------------------------------------------------------------------------------------------------------------------------------------------------------------------------------------------------------------------------------------------------------|----------------------------------------------------------------------------------------------------------------------------------------|
|  | <p>Could you define this decision as:</p> <ul style="list-style-type: none"><li><input type="checkbox"/> A creative solution (i.e., completely new, taken based on an intuition or other)</li><li><input type="checkbox"/> A ready-made decision that has been modified/adapted</li><li><input type="checkbox"/> An imposed decision</li></ul> <p><u>Probe:</u> In what way (how) was it a new/ready-made decision? If it was an imposed decision, who or what imposed that decision?</p> |                                                                                                                                        |
|  | <p><b>9-</b> If applicable, did you have any concerns when making decisions during COVID - 19?</p> <p><u>Probe:</u> Can you describe these concerns?</p>                                                                                                                                                                                                                                                                                                                                  | <ul style="list-style-type: none"><li><input type="checkbox"/> Yes</li><li><input type="checkbox"/> No</li></ul> <p><b>Quotes:</b></p> |

|  |                                                                                                                                                                                                                                                                                                                                                           |                                                                                                         |
|--|-----------------------------------------------------------------------------------------------------------------------------------------------------------------------------------------------------------------------------------------------------------------------------------------------------------------------------------------------------------|---------------------------------------------------------------------------------------------------------|
|  | <p><b>10-</b> Do you think that having had a general understanding of the COVID-19 pandemic had influenced your decision-making? (<u>If answered yes to Question #5</u>)</p> <p><b>OR-</b> Do you think that the lack of a general understanding of the COVID-19 pandemic had influenced your decision-making? (<u>If answered no to Question #5</u>)</p> | <p><input type="checkbox"/> Yes<br/><input type="checkbox"/> No</p> <p><b>Quotes:</b></p>               |
|  | <p><b>11-</b> Were there some decisions you could not made?</p> <p>Probe: Please, further elaborate on the obstacle that hindered your decisions?</p>                                                                                                                                                                                                     | <p><input type="checkbox"/> <b>Yes</b><br/><input type="checkbox"/> <b>No</b></p> <p><b>Quotes:</b></p> |

|                              |                                                                                                                                                                                                                                                                                                                                                                                                                                                                                                                                                                                                                                                                                                                                                                                                               |                                                                       |
|------------------------------|---------------------------------------------------------------------------------------------------------------------------------------------------------------------------------------------------------------------------------------------------------------------------------------------------------------------------------------------------------------------------------------------------------------------------------------------------------------------------------------------------------------------------------------------------------------------------------------------------------------------------------------------------------------------------------------------------------------------------------------------------------------------------------------------------------------|-----------------------------------------------------------------------|
| <p><b>4. Antecedents</b></p> | <p><b>12-</b> What were the criteria you considered before making each of the previous decisions you explained?</p> <ul style="list-style-type: none"> <li><input type="checkbox"/> Time</li> <li><input type="checkbox"/> Information availability</li> <li><input type="checkbox"/> Human resources</li> <li><input type="checkbox"/> Material/environmental resources</li> <li><input type="checkbox"/> Co-responsibility</li> <li><input type="checkbox"/> Your ability to make change</li> <li><input type="checkbox"/> Possibility of simplify the problem</li> <li><input type="checkbox"/> Availability of already known solutions</li> <li><input type="checkbox"/> Competence</li> <li><input type="checkbox"/> Guidelines/legislation</li> <li><input type="checkbox"/> Other (specify)</li> </ul> | <p><b>Quotes:</b></p>                                                 |
|                              | <p><b>13-</b> Among these, list up to 3 most relevant criteria you used to prioritise decisions during the COVID-19 pandemic</p> <p><u>Probe:</u> could you describe the criteria you used to prioritise your decisions? (If less than 3)</p>                                                                                                                                                                                                                                                                                                                                                                                                                                                                                                                                                                 | <p>1. _____</p> <p>2. _____</p> <p>3. _____</p> <p><b>Quotes:</b></p> |

|  |                                                                                                                                                                                                               |                                                                                           |
|--|---------------------------------------------------------------------------------------------------------------------------------------------------------------------------------------------------------------|-------------------------------------------------------------------------------------------|
|  | <p><b>14-</b> Did you feel that you had the authority to make decisions you have made?</p> <p><u>Probe:</u> Do you perceive that you were considered by others to be in the right role to make decisions?</p> | <p><input type="checkbox"/> Yes<br/><input type="checkbox"/> No</p> <p><b>Quotes:</b></p> |
|  | <p><b>15-</b> Did you feel confident in making decisions you have made?</p> <p><u>Probe:</u> Do you perceive that you were considered confident enough by others to make decisions?</p>                       | <p><input type="checkbox"/> Yes<br/><input type="checkbox"/> No</p> <p><b>Quotes:</b></p> |

**5. Consequences**

**16-** Did the decisions you made result in positive outcomes?

**17-** Did you have to readjust your decisions?

Probe: What contributed to these readjustments? Probe: Which decisions did you have to readjust and why did you have to do so?

**18-** List up to 3 consequences of your decisions you are more satisfied with

Probe: Why were these/was this?  
Probe: Why does these decisions make you satisfied? Probe: What impact on your institution/the society did they have?

- Yes
- No

**Quotes:**

- 1. \_\_\_\_\_
- 2. \_\_\_\_\_
- 3. \_\_\_\_\_

**Quotes:**

|                          |                                                                                                                                                                                                                                                                                                                    |                                                                       |
|--------------------------|--------------------------------------------------------------------------------------------------------------------------------------------------------------------------------------------------------------------------------------------------------------------------------------------------------------------|-----------------------------------------------------------------------|
|                          | <p><b>19-</b> List up to 3 consequences of your decisions you are less satisfied with</p> <p><u>Probe:</u> Why were these/was this?</p> <p><u>Probe:</u> Why does these decisions make you unsatisfied?</p>                                                                                                        | <p>1. _____</p> <p>2. _____</p> <p>3. _____</p> <p><b>Quotes:</b></p> |
| <p><b>6. Closing</b></p> | <p><b>20-</b> What differences have you found in your decision-making role compared to the pre- pandemic situation?</p> <p><u>Probe:</u> Has the degree of your involvement in decision- making during the pandemic changed in some ways?</p> <p><u>Probe:</u> Do you feel more confident as a decision maker?</p> | <p><b>Quotes:</b></p>                                                 |

|  |                                                                                                                                     |                       |
|--|-------------------------------------------------------------------------------------------------------------------------------------|-----------------------|
|  | <p><b>21-</b> Is there anything else you would like to add?</p> <p><u>Probe:</u> Why do you think this is important to address?</p> | <p><b>Quotes:</b></p> |
|--|-------------------------------------------------------------------------------------------------------------------------------------|-----------------------|
